# Supplementary material for: Hydrolyzable vs. Condensed Wood Tannins for Bio-based Antioxidant Coatings: Superior Properties of Quebracho Tannins
Source: PubMed Central journal article supplement (PMC7556001; doi:10.3390/antiox9090804), 2020-08-31
Supplement: antioxidants-09-00804-s001.pdf [file antioxidants-09-00804-s001.pdf]

# Hydrolyzable *vs.* Condensed Wood Tannins for Bio-based Antioxidant Coatings

Federica Moccia <sup>1</sup>, Alessandra Piscitelli <sup>1</sup>, Samuele Giovando <sup>2</sup>, Paola Giardina <sup>1</sup>, Lucia Panzella <sup>1,\*</sup>, Marco d'Ischia <sup>1</sup> and Alessandra Napolitano <sup>1</sup>

<sup>1</sup> Department of Chemical Sciences, University of Naples "Federico II", Via Cintia 4, I-80126 Naples, Italy; federica.moccia@unina.it (F.M.); apiscite@unina.it (A.P.); giardina@unina.it (P.G.); dischia@unina.it (M.d.I.); alesnapo@unina.it (A.N.)

<sup>2</sup> Centro Ricerche per la Chimica Fine Srl for Silvateam Spa, Via Torre 7, I-12080, San Michele Mondovì, CN, Italy; sgiovando@silvateam.com

\* Correspondence: panzella@unina.it; Tel.: +39-081-674131

| Table of contents                                                                                                                                                         | Page |
|---------------------------------------------------------------------------------------------------------------------------------------------------------------------------|------|
| <b>Figure S1.</b> Comparison of the UV-vis spectra at 2 h of 0.5 mg/mL (a) QT and (b) CT solutions in the presence or absence of the nylon filter.                        | 2    |
| <b>Table S1.</b> Amounts of tannins adhered to the nylon membrane filters under the different coating conditions.                                                         | 3    |
| <b>Figure S2.</b> Correlation between the amounts of tannin adhered to the nylon membrane filters and the initial concentrations of (a) QT and (b) CT in water .          | 4    |
| <b>Figure S3.</b> Correlation between the percentages of DPPH reduced by the functionalized substrates and the amounts of tannin adhered.                                 | 5    |
| <b>Figure S4.</b> UV-vis spectra of (a) released QT and (b) released CT from the nylon filters after washing in ethanol for 2.5 h.                                        | 6    |
| <b>Table S2.</b> Trolox equivalents determined for the tannin-coated nylon membrane filters in the FRAP assay.                                                            | 7    |
| <b>Figure S5.</b> Correlation between the Fe <sup>3+</sup> -reducing properties of the functionalized substrates and the amounts of tannin adhered.                       | 8    |
| <b>Figure S6.</b> UV-vis spectra of (a) QT and (b) CT solutions in 0.1 M carbonate buffer (pH 9.0), before and after addition of different additives.                     | 9    |
| <b>Figure S7.</b> UV-vis spectra of (a) QT and (b) CT solutions in 0.05 M phosphate buffer (pH 6.0) containing laccase, before and after addition of different additives. | 10   |

**Figure S8.** UV-vis spectra of (a) QT and (b) CT solutions in water containing  $\text{FeSO}_4$ , before and after addition of different additives.

11

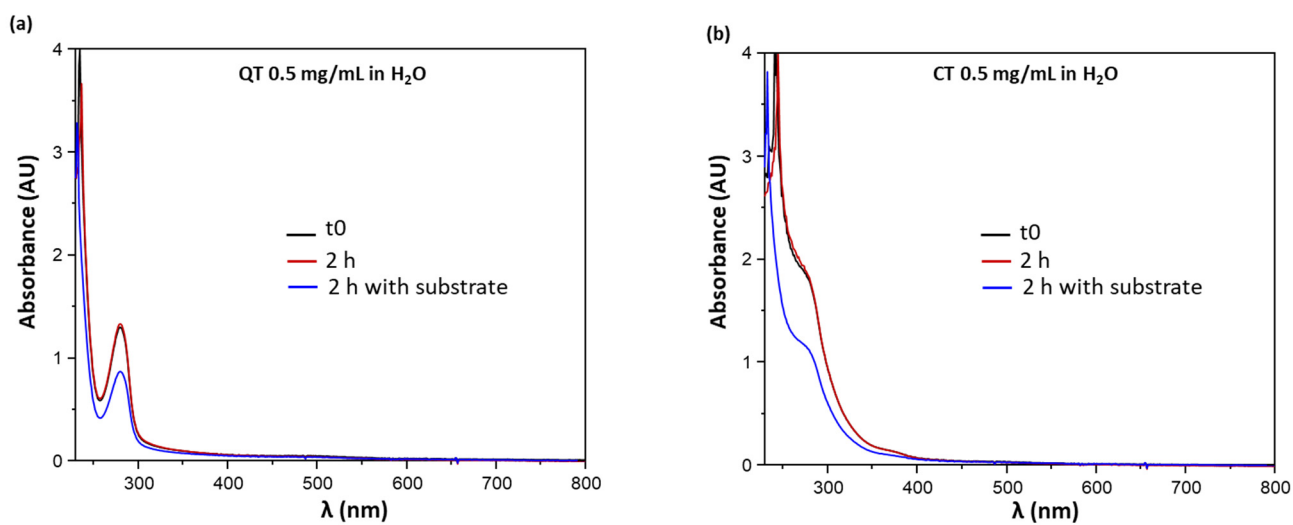

**Figure S1.** Comparison of the UV-vis spectra at 2 h of 0.5 mg/mL (a) QT and (b) CT solutions in the presence or absence of the nylon filter.

**Table S1.** Amounts of tannin adhered to the nylon membrane filter under the different coating conditions.<sup>1</sup>

| <b>Sample</b>                                          | <b>mg of tannins adsorbed/mg substrate<br/>(after 2 h)</b> |
|--------------------------------------------------------|------------------------------------------------------------|
| QT (0.5 mg/mL) in H <sub>2</sub> O                     | 0.28 ± 0.01                                                |
| QT (0.1 mg/mL) in H <sub>2</sub> O                     | 0.031 ± 0.001                                              |
| QT (0.02 mg/mL) in H <sub>2</sub> O                    | 0.0061 ± 0.0003                                            |
| QT (0.1 mg/mL) + laccase in H <sub>2</sub> O           | 0.031 ± 0.002                                              |
| QT (0.1 mg/mL) + laccase<br>in phosphate buffer pH 6.0 | 0.021 ± 0.001                                              |
| QT (0.1 mg/mL)<br>in carbonate buffer pH 9.0           | 0.021 ± 0.001                                              |
| CT (0.5 mg/mL) in H <sub>2</sub> O                     | 0.26 ± 0.01                                                |
| CT (0.1 mg/mL) in H <sub>2</sub> O                     | 0.042 ± 0.002                                              |
| CT (0.02 mg/mL) in H <sub>2</sub> O                    | 0.041 ± 0.002                                              |
| CT (0.1 mg/mL) + laccase in H <sub>2</sub> O           | 0.041 ± 0.002                                              |
| CT (0.1 mg/mL) + laccase<br>in phosphate buffer pH 6.0 | 0.032 ± 0.002                                              |
| CT (0.1 mg/mL)<br>in carbonate buffer pH 9.0           | 0.011 ± 0.001                                              |

<sup>1</sup> Reported are the mean ± SD values of at least three experiments.

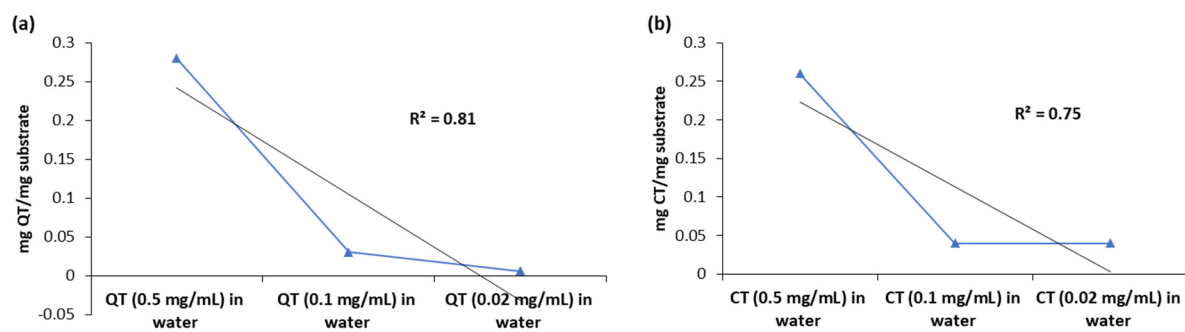

**Figure S2.** Correlation between the amounts of tannin adhered to the nylon membrane filters and the initial concentrations of (a) QT and (b) CT in water.

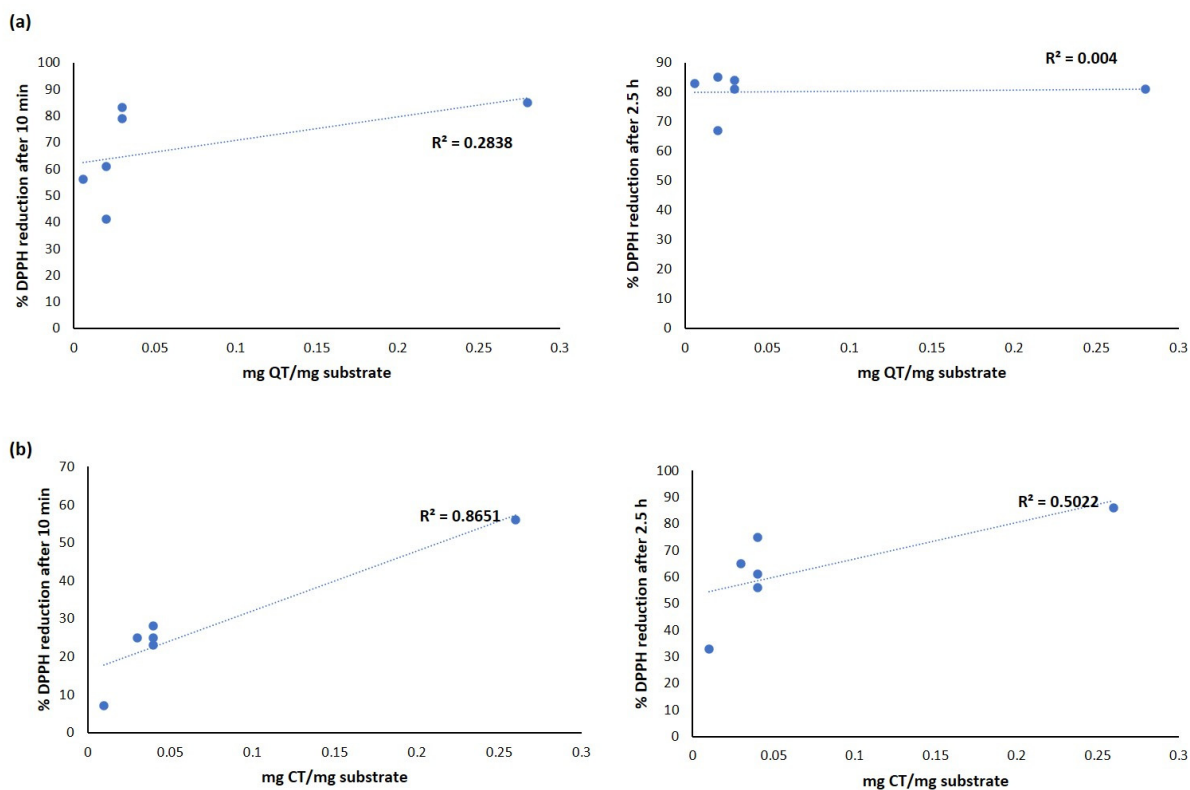

**Figure S3.** Correlation between the percentages of DPPH reduced after 10 min (left) and 2.5 h (right) and the amounts of (a) QT and (b) CT adhered to the nylon membrane filters.

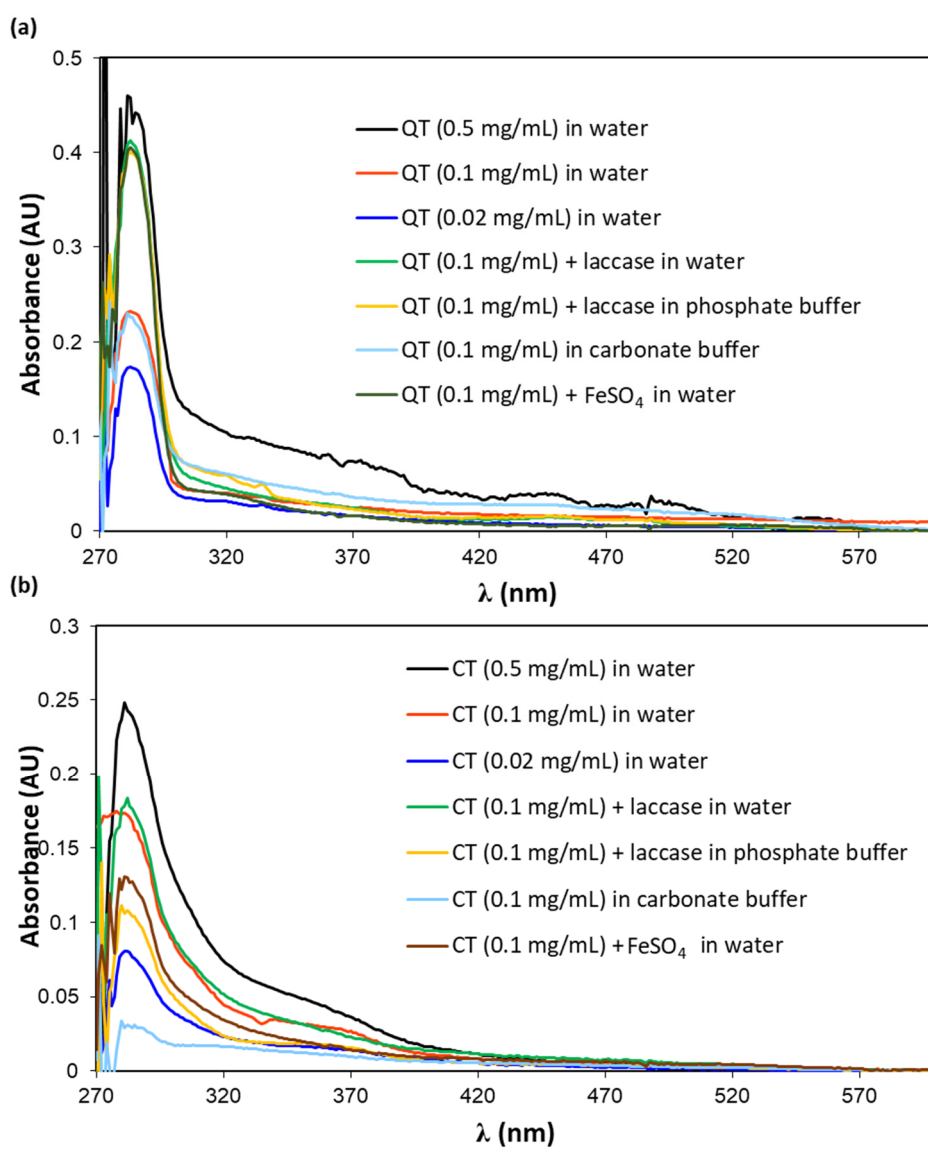

**Figure S4.** UV-vis spectra of (a) released QT and (b) released CT from the nylon filters after washing in ethanol for 2.5 h.

**Table S2.** Trolox equivalents determined for the tannin-coated nylon membrane filters in the FRAP assay.<sup>1</sup>

| Sample                                                   | nmol Trolox/mg filter<br>(after 10 min) | nmol Trolox/mg filter<br>(after 2.5 h) |
|----------------------------------------------------------|-----------------------------------------|----------------------------------------|
| QT (0.5 mg/mL) in H <sub>2</sub> O                       | 6.9 ± 0.7 <sup>a</sup>                  | 32 ± 3 <sup>a</sup>                    |
| QT (0.1 mg/mL) in H <sub>2</sub> O                       | 5.8 ± 0.6 <sup>a,b</sup>                | 29 ± 3 <sup>a,b</sup>                  |
| QT (0.02 mg/mL) in H <sub>2</sub> O                      | 5.5 ± 0.5 <sup>b</sup>                  | 25 ± 2 <sup>b,c</sup>                  |
| QT (0.1 mg/mL) + laccase in H <sub>2</sub> O             | 4.8 ± 0.5 <sup>b,c</sup>                | 26 ± 3 <sup>a,b,c</sup>                |
| QT (0.1 mg/mL) + laccase<br>in phosphate buffer (pH 6.0) | 11 ± 1 <sup>d</sup>                     | 26 ± 3 <sup>a,b,c</sup>                |
| QT (0.1 mg/mL)<br>in carbonate buffer (pH 9.0)           | 5.2 ± 0.5 <sup>b</sup>                  | 25 ± 2 <sup>b,c</sup>                  |
| QT (0.1 mg/mL) + FeSO <sub>4</sub> in H <sub>2</sub> O   | 5.8 ± 0.6 <sup>a,b</sup>                | 28 ± 3 <sup>a,b</sup>                  |
| CT (0.5 mg/mL) in H <sub>2</sub> O                       | 10 ± 1 <sup>d</sup>                     | 35 ± 4 <sup>a</sup>                    |
| CT (0.1 mg/mL) in H <sub>2</sub> O                       | 9 ± 1 <sup>d</sup>                      | 33 ± 3 <sup>a</sup>                    |
| CT (0.02 mg/mL) in H <sub>2</sub> O                      | 6.1 ± 0.7 <sup>a,b</sup>                | 22 ± 2 <sup>c</sup>                    |
| CT (0.1 mg/mL) + laccase in H <sub>2</sub> O             | 4.9 ± 0.5 <sup>b,c</sup>                | 25 ± 3 <sup>b,c</sup>                  |
| CT (0.1 mg/mL) + laccase<br>in phosphate buffer (pH 6.0) | 4.2 ± 0.4 <sup>c</sup>                  | 21 ± 2 <sup>c</sup>                    |
| CT (0.1 mg/mL)<br>in carbonate buffer (pH 9.0)           | 3.1 ± 0.3 <sup>e</sup>                  | 12 ± 1 <sup>d</sup>                    |
| CT (0.1 mg/mL) + FeSO <sub>4</sub> in H <sub>2</sub> O   | 5.9 ± 0.6 <sup>a,b</sup>                | 26 ± 3 <sup>a,b,c</sup>                |

<sup>1</sup> Reported are the mean ± SD values of at least three experiments. Values in a column without a common letter are significantly different (P < 0.05).

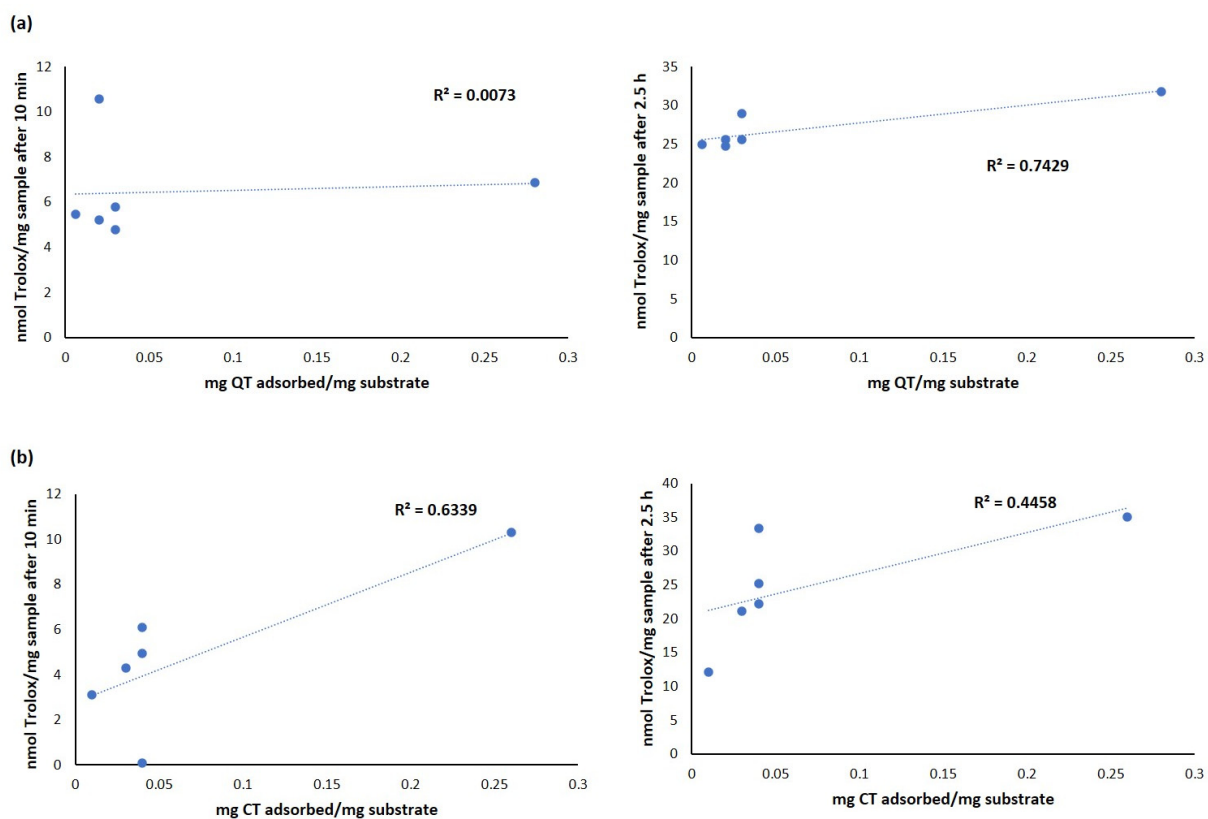

**Figure S5.** Correlation between the  $\text{Fe}^{3+}$ -reducing properties of the functionalized substrates after 10 min (left) and 2.5 h (right) and the amounts of (a) QT and (b) CT adhered to the substrate.



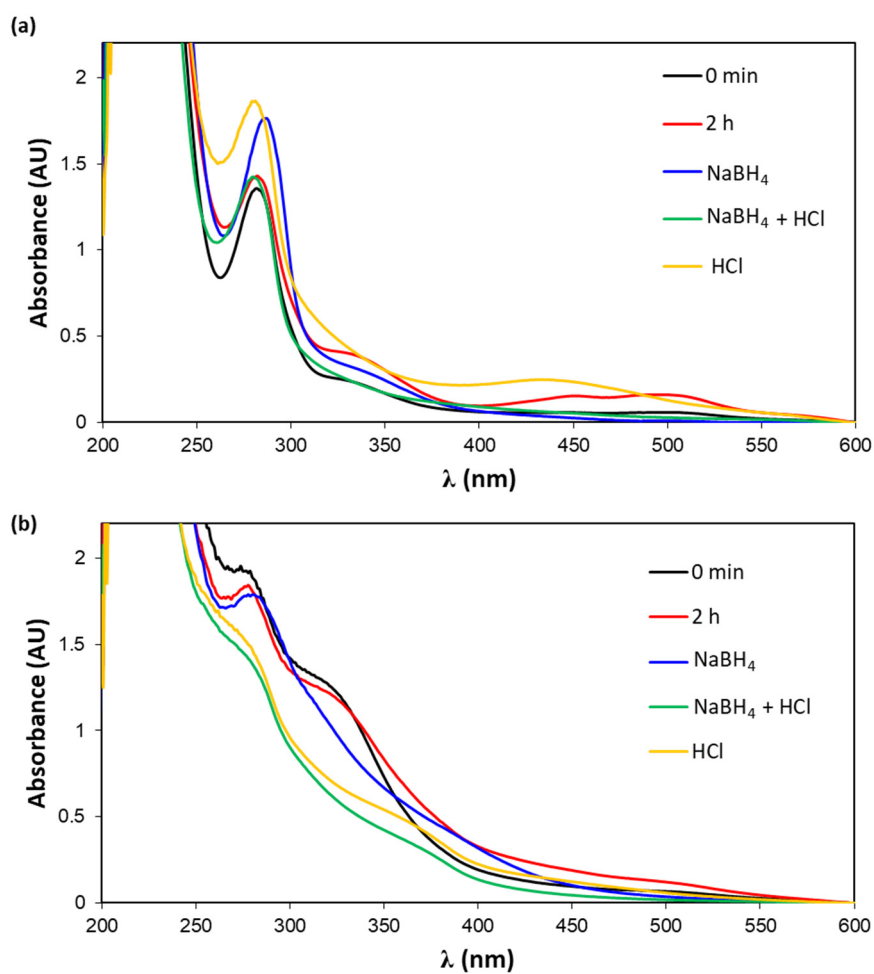

**Figure S6.** UV-vis spectra of (a) QT and (b) CT solutions in 0.1 M carbonate buffer (pH 9.0), before and after addition of different additives.

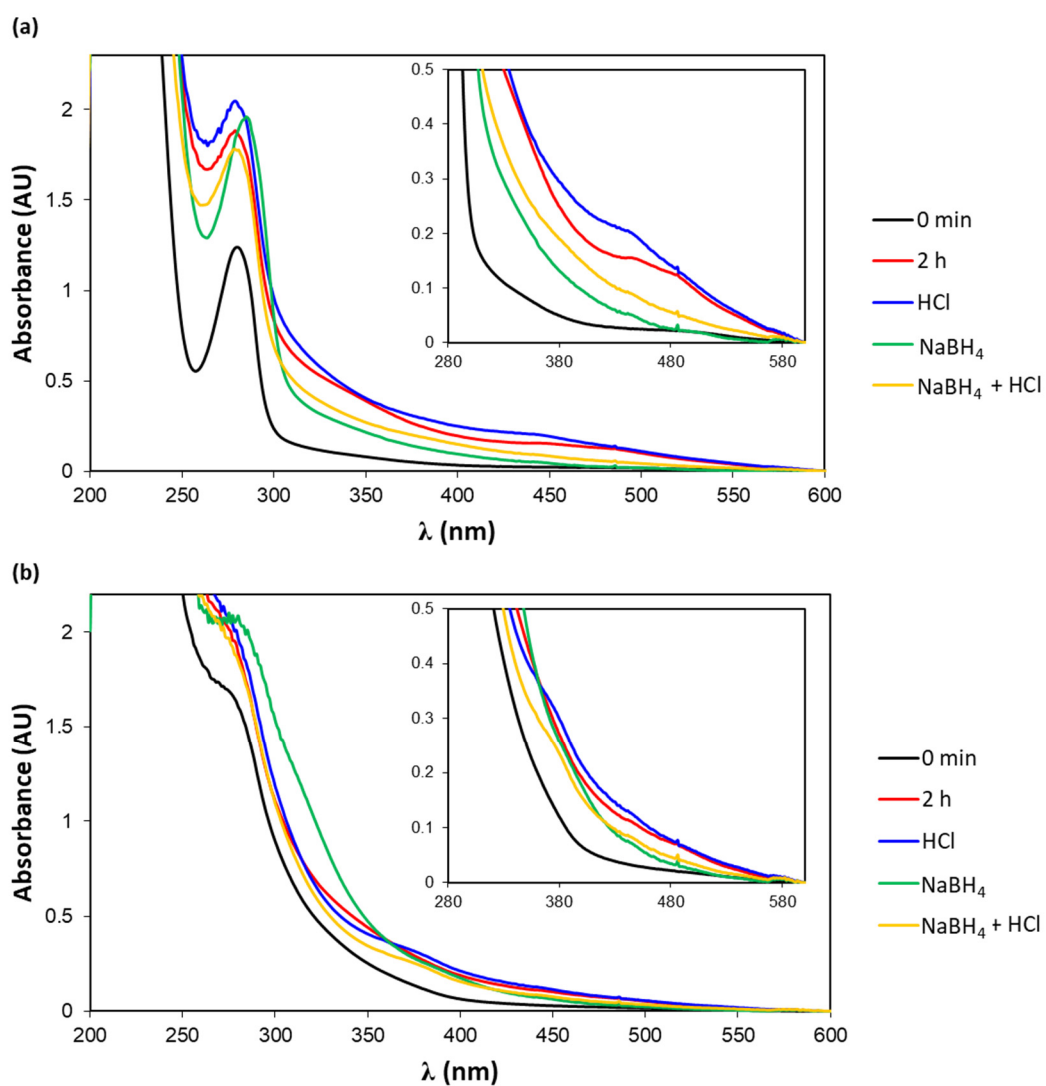

**Figure S7.** UV-vis spectra of (a) QT and (b) CT solutions in 0.05 M phosphate buffer (pH 6.0) containing laccase, before and after addition of different additives.

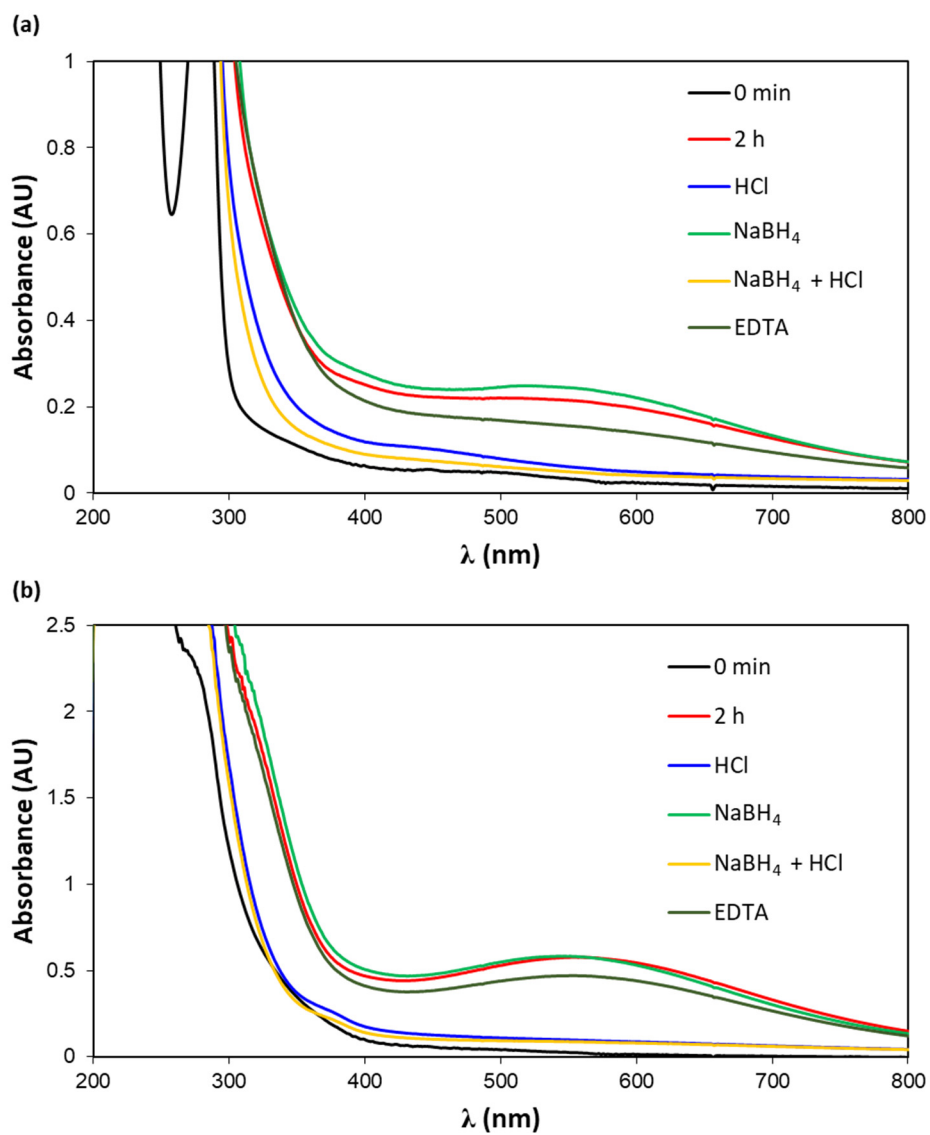

**Figure S8.** UV-vis spectra of (a) QT and (b) CT solutions in water containing FeSO<sub>4</sub>, before and after addition of different additives.
